# Supplementary material
Source: publisher figshare collection journal article supplement (https://frontiersin.figshare.com/ndownloader/files/28744071)
Supplement: Supplementary file [file 28744071]

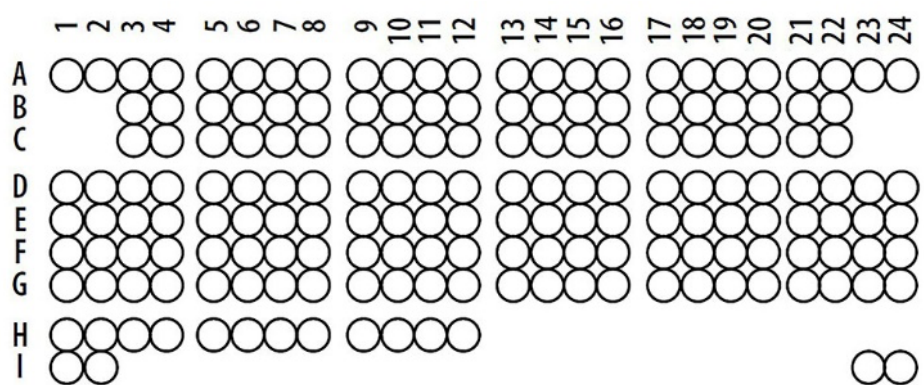

**Supplementary Figure S1** | Human XL Oncology Array Coordinates.
